# Supplementary material
Source: PubMed Central journal article supplement (PMC6507473)

Figure S1. BIAcore analysis of the affinities of the AXL<sup>-ECD</sup>-Fc-M3/M4 fusion proteins for Gas6. The mutants M3/M4 possessed weak affinity and exhibited reduced binding with Gas6. AXL, AXL receptor tyrosine kinase ligand; Gas6, growth arrest-specific protein 6; Resp. diff, Different reaction values; RU, Reaction values.

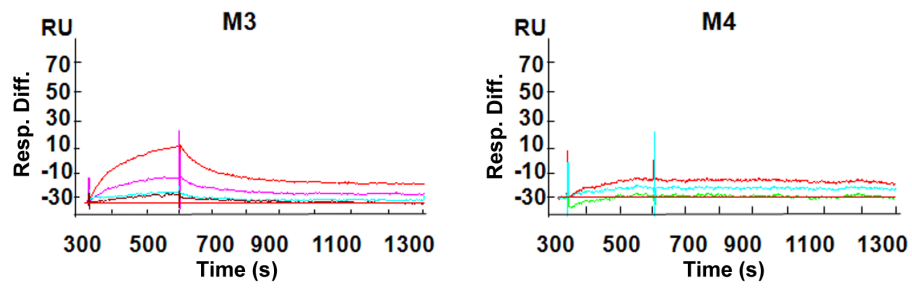

Figure S2. Expression of p-AXL in H1299 and MDA-MB-231 cells treated with or without free Gas6. p, phosphorylated; AXL, AXL receptor tyrosine kinase ligand; Gas6, growth arrest-specific protein 6.

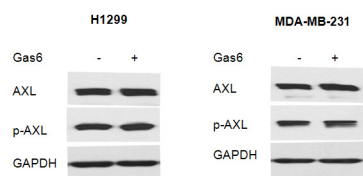

Supplement: Supplementary_Data.pdf [file Supplementary_Data.pdf]
